# Supplementary material for: Selective sorption and subsequent photocatalytic degradation of cationic dyes by sonochemically synthesized nano CuWO4and Cu3Mo2O9
Source: Royal Society of Chemistry journal article supplement (doi:10.1039/c5ra20754a), 2015-01-01
Supplement: c5ra20754a1.pdf [file c5ra20754a1.pdf]

### Supplementary Information

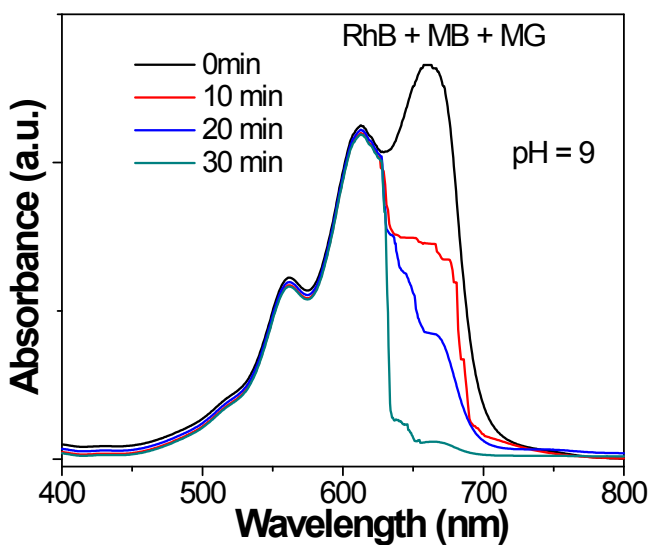

**Figure S1:** Selective sorption of MB dye from 20ppm mixture of RhB, MB and MG by  $\text{CuWO}_4$  nanoparticles at pH = 9.

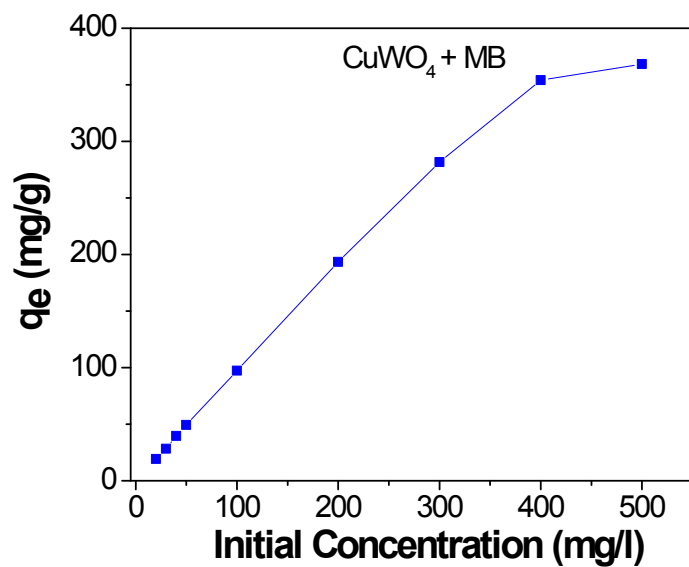

**Figure S2:** The extent of sorption of MB dye (pH = 3) by 10mg  $\text{CuWO}_4$  nanoparticles as a function of the initial dye concentration.
